# Supplementary material
Source: MDPI journal article supplement (https://www.mdpi.com/1424-8247/15/9/1135)
Supplement: s1 [file s1]

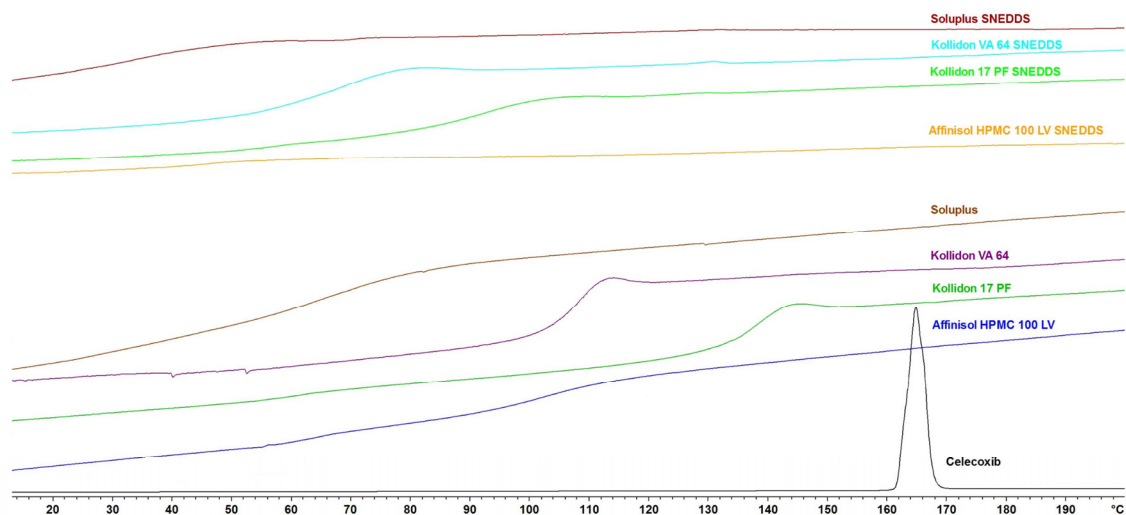

(a)

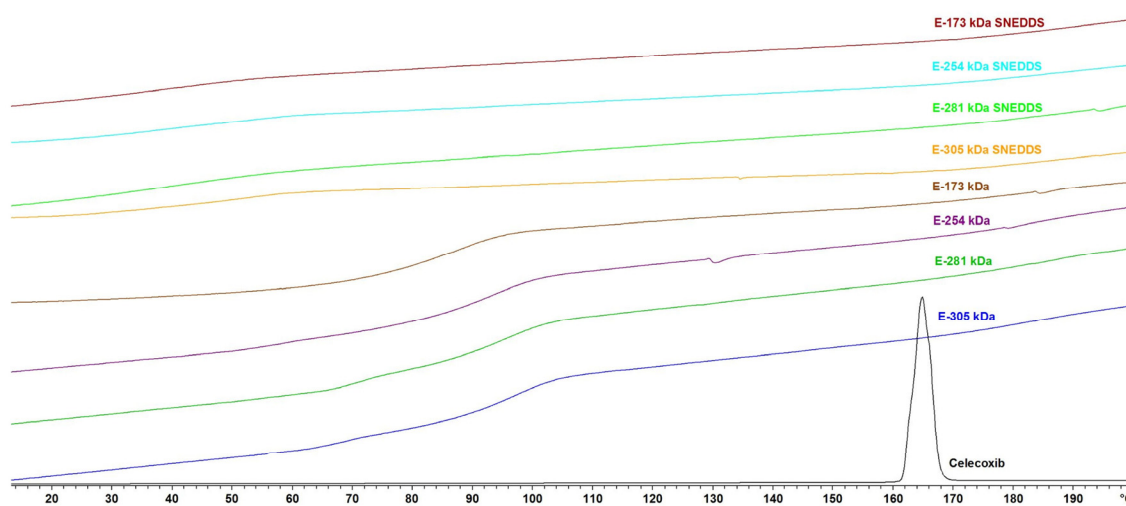

(b)

**Figure S1.** DSC thermograms of celecoxib, ModE copolymers, and the corresponding S-SNEDDS (a), celecoxib and other marketed (co)polymers used in the study, and the corresponding S-SNEDDS (b).

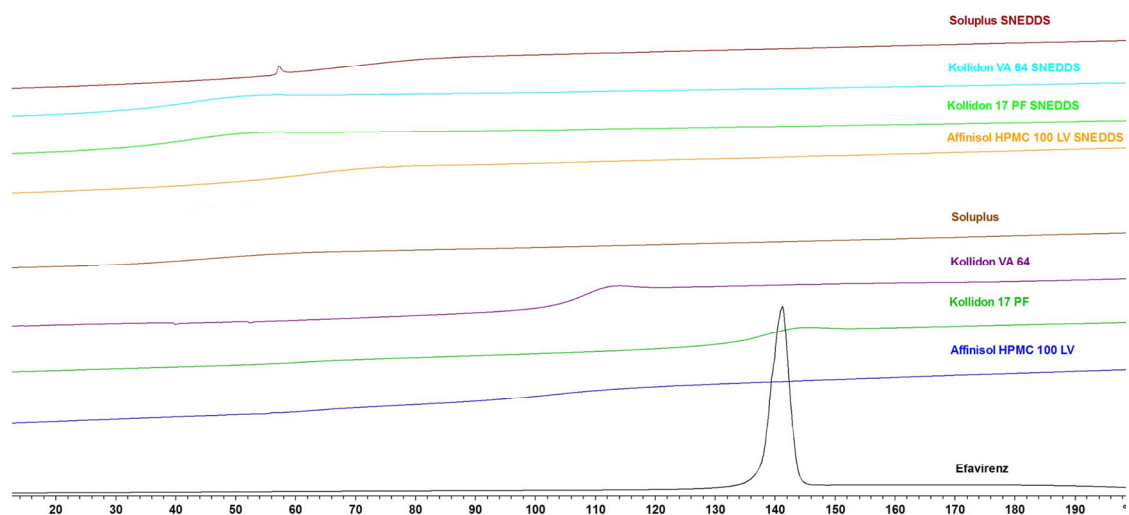

(a)

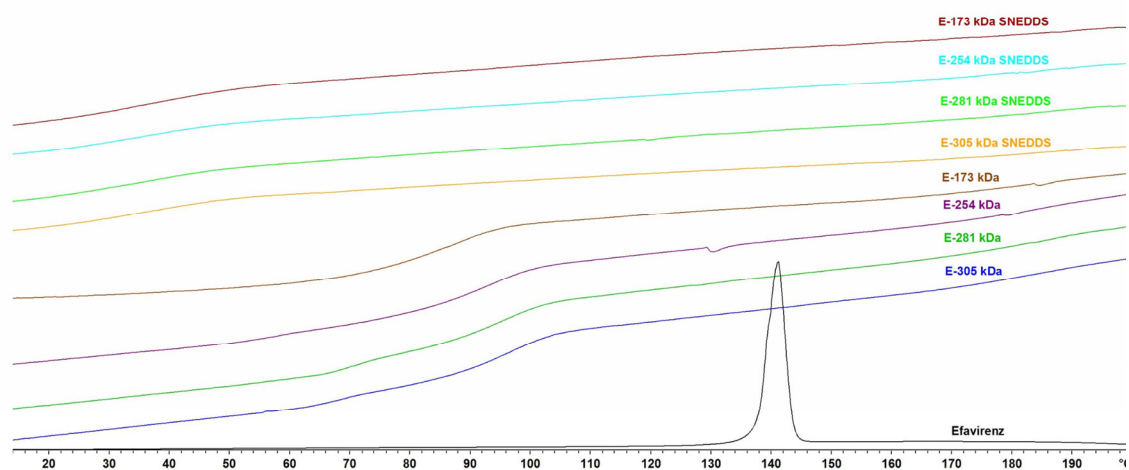

(b)

**Figure S2.** DSC thermograms of efavirenz, ModeE copolymers, and the corresponding S-SNEDDS (a), efavirenz and other marketed (co)polymers used in the study, and the corresponding S-SNEDDS (b)

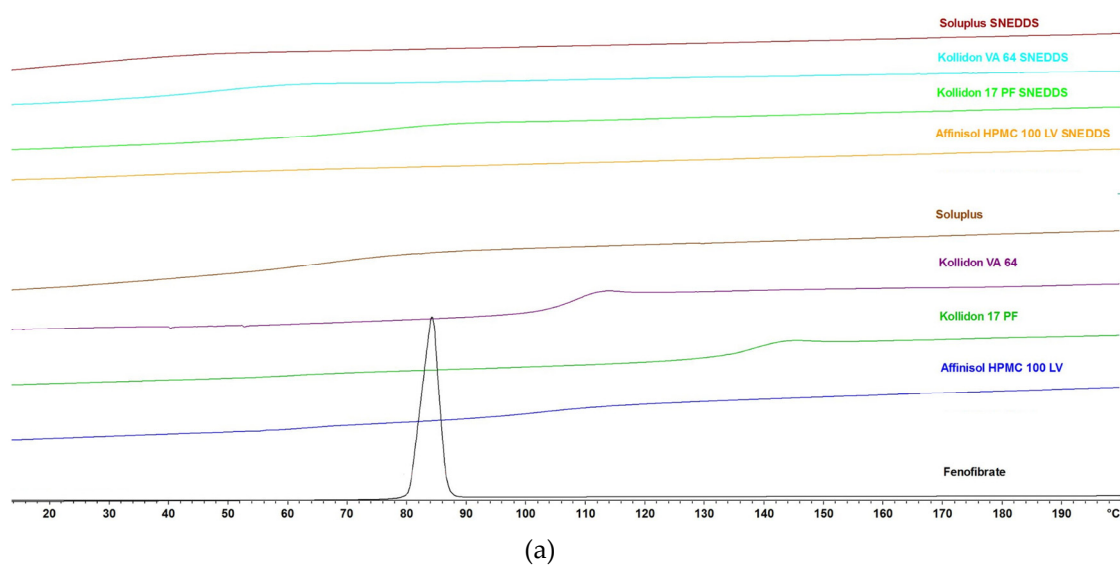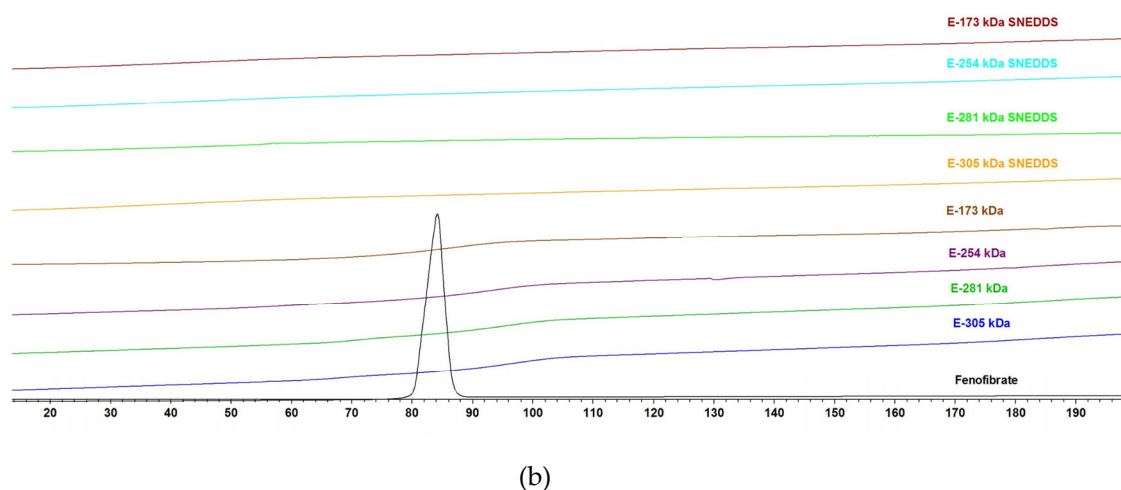

**Figure S3.** DSC thermograms of fenofibrate, ModE copolymers, and the corresponding S-SNEDDS (a), fenofibrate and other marketed (co)polymers used in the study, and the corresponding S-SNEDDS (b).

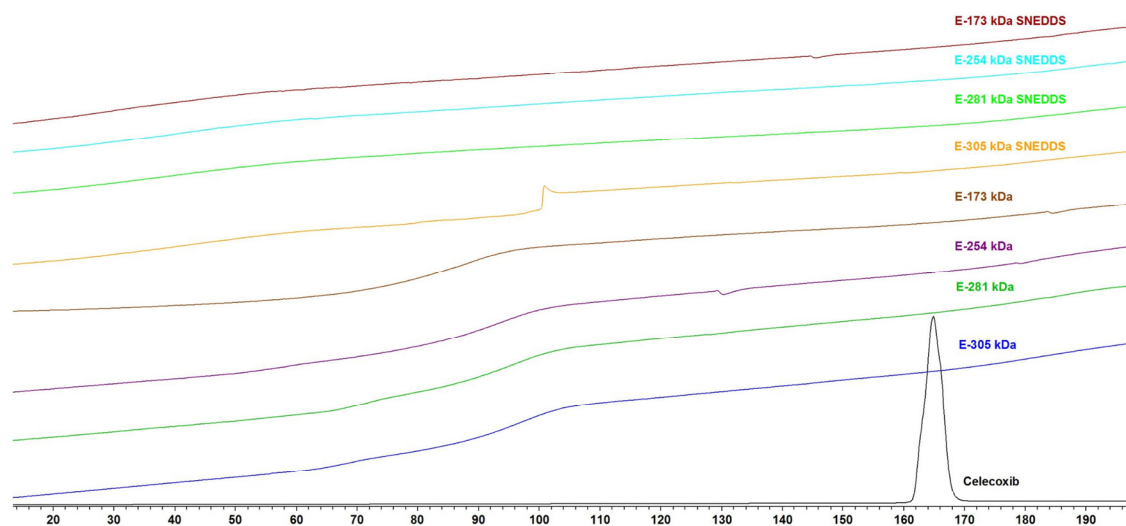

(a)

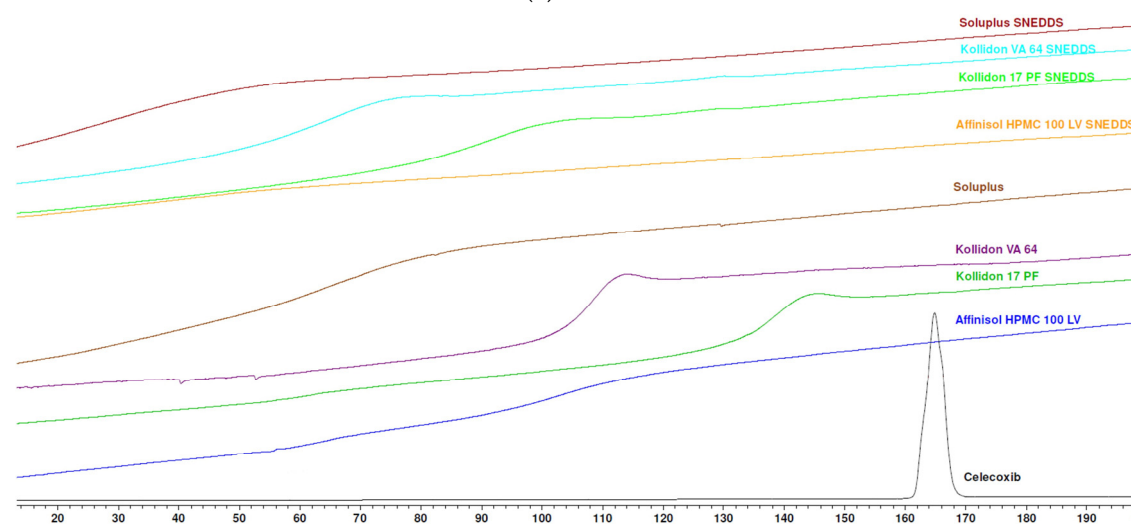

(b)

**Figure S4.** DSC thermograms (after six months of storage at 30 °C/65% RH) of celecoxib, ModE copolymers, and the corresponding S-SNEDDS (a), celecoxib and other marketed (c) polymers used in the study, and the corresponding S-SNEDDS (b).

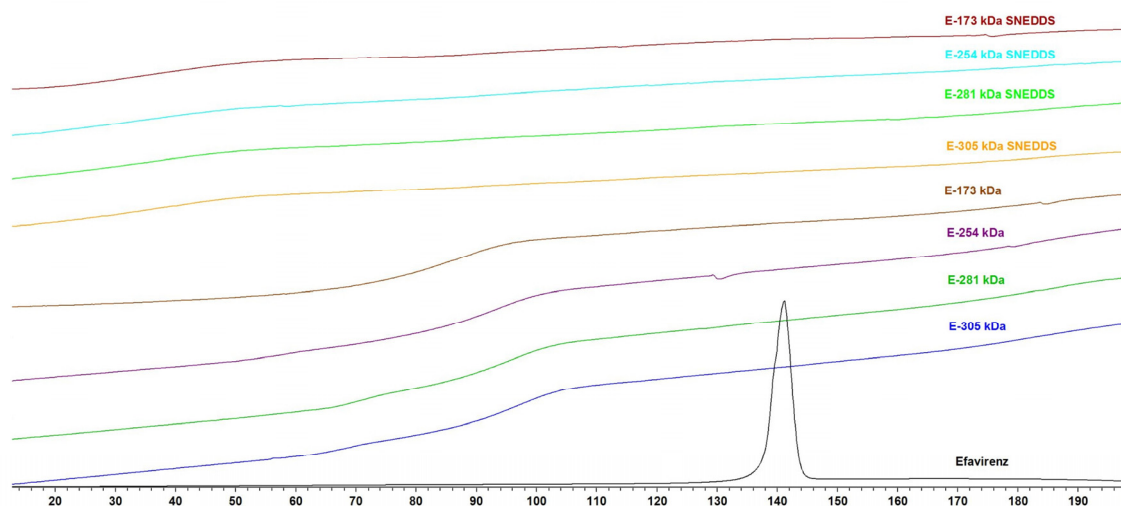

(a)

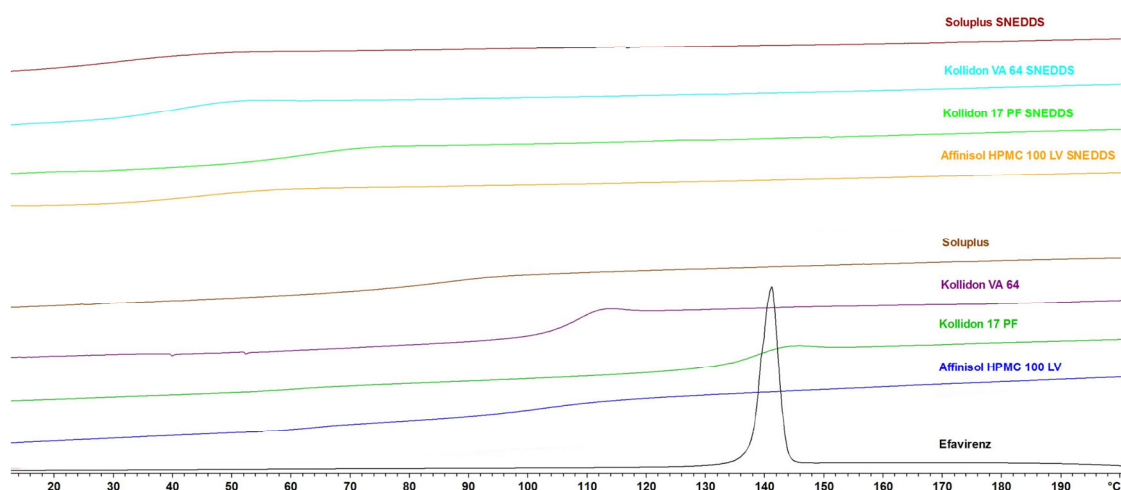

(b)

**Figure S5.** DSC thermograms (after six months of storage at 30 °C/65% RH) of efavirenz, ModeE copolymers, and the corresponding S-SNEDDS (a), efavirenz and other marketed (co)polymers used in the study, and the corresponding S-SNEDDS (b).

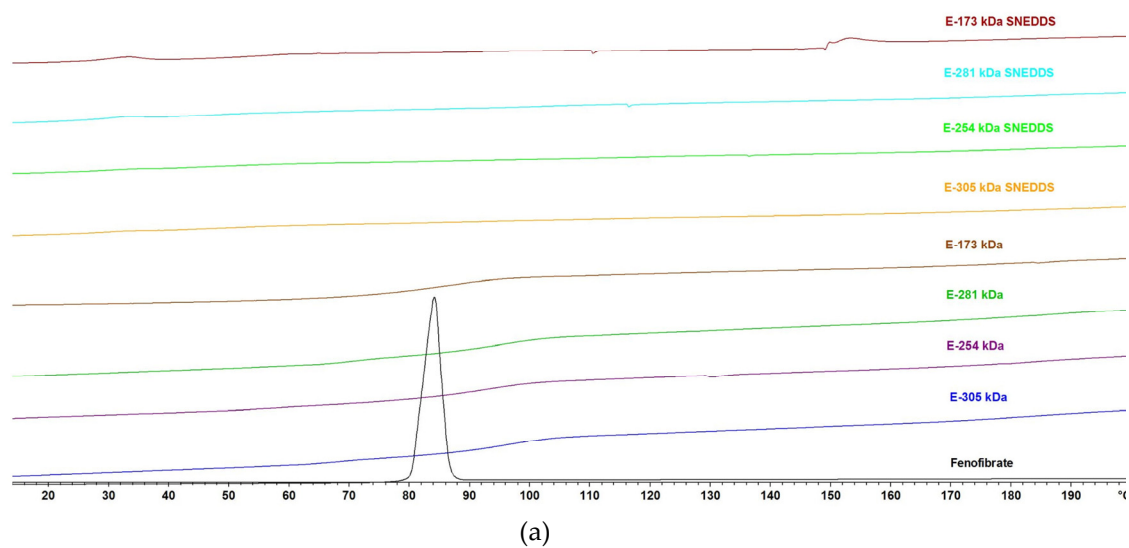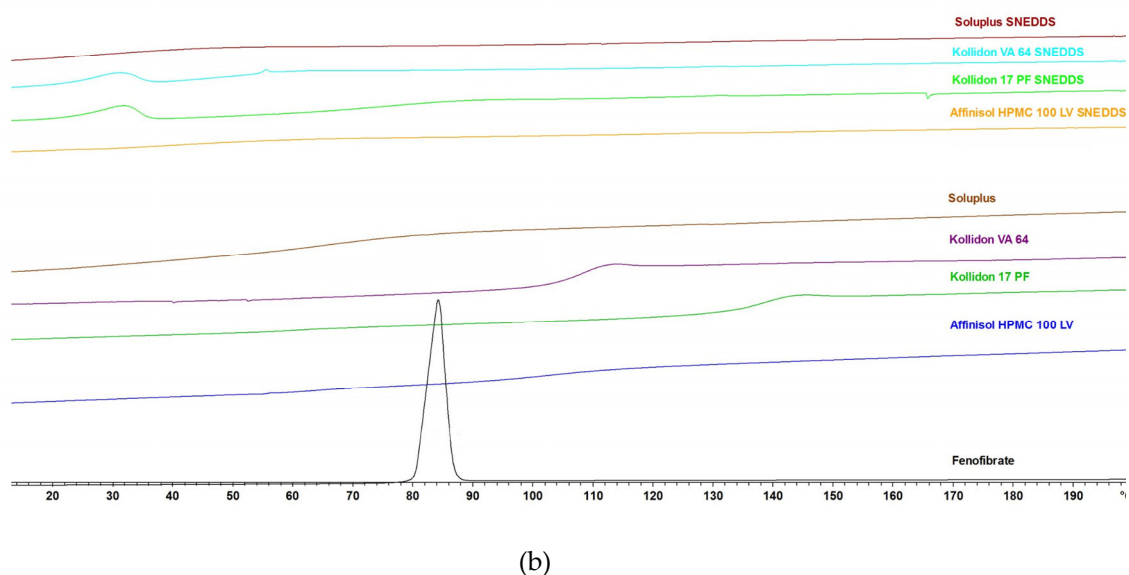

**Figure S6.** DSC thermograms (after six months of storage at 30 °C/65% RH) of fenofibrate, Mode copolymers, and the corresponding S-SNEDDS (a), fenofibrate and other marketed (c)polymers used in the study, and the corresponding S-SNEDDS (b).

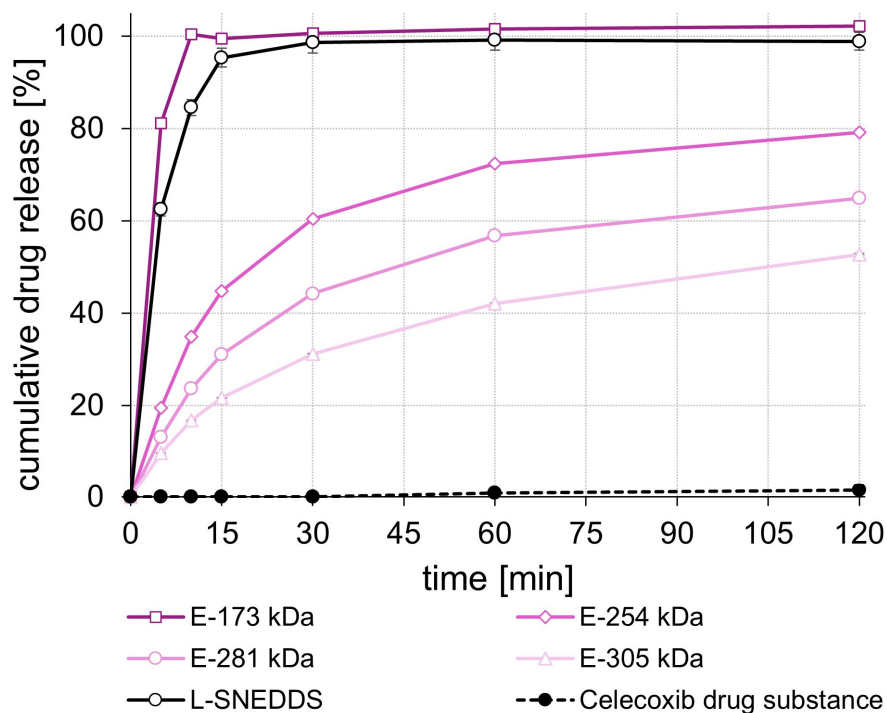

(a)

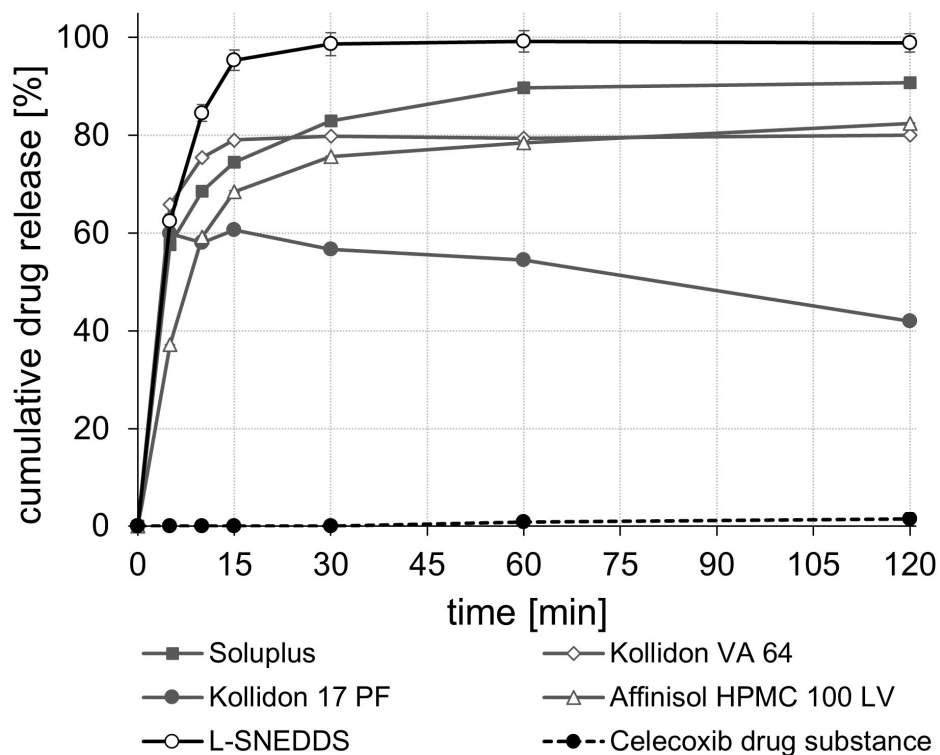

(b)

**Figure S7.** Dissolution profiles of celecoxib drug substance and celecoxib L- and S-SNEDDS based on ModE (a), as well as celecoxib drug substance and celecoxib L- and S-SNEDDS based on other marketed (co)polymers (b) (after three months of storage at 30 °C/65% RH) in 500 mL 0.1 M HCl in USP apparatus II. Each value designates the mean  $\pm$  S.D. ( $n = 3$ ).

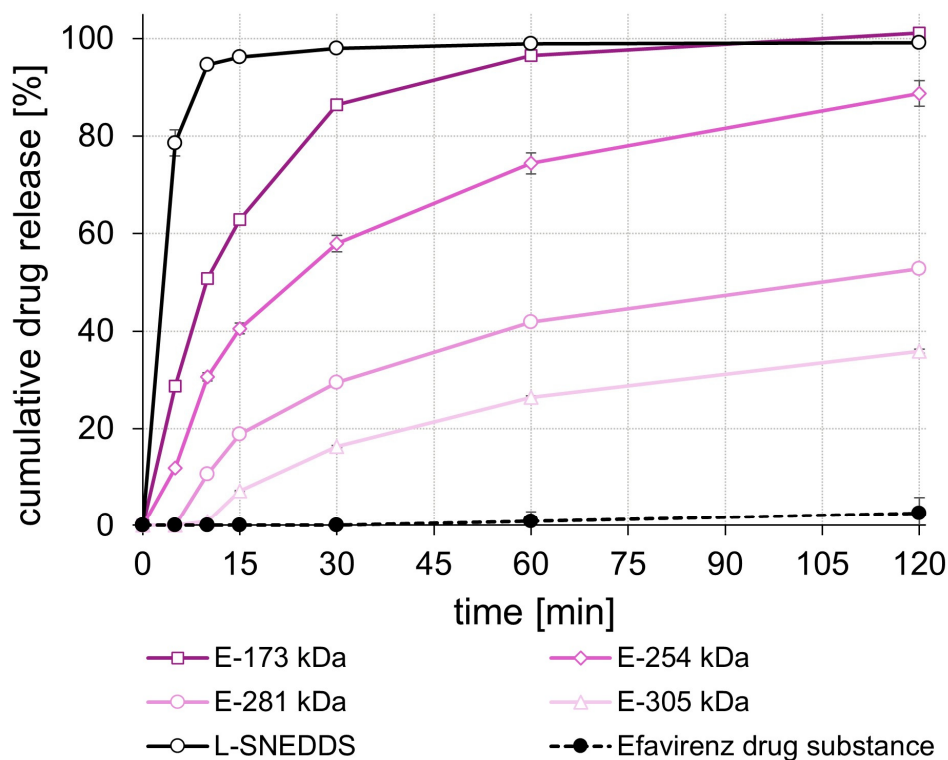

(a)

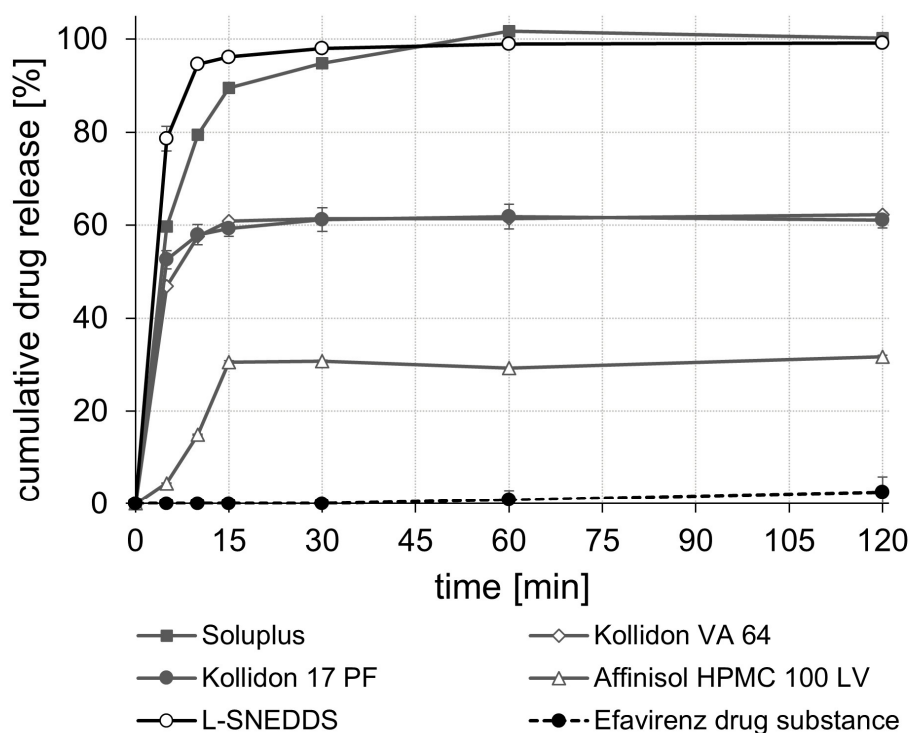

(b)

**Figure S8.** Dissolution profiles of efavirenz drug substance and efavirenz L- and S-SNEDDS based on ModE (a), as well as efavirenz drug substance and efavirenz L- and S-SNEDDS based on other marketed (co)polymers (b) (after three months of storage at 30 °C/65% RH) in 500 mL 0.1 M HCl in USP apparatus II. Each value designates the mean  $\pm$  S.D. ( $n = 3$ ).

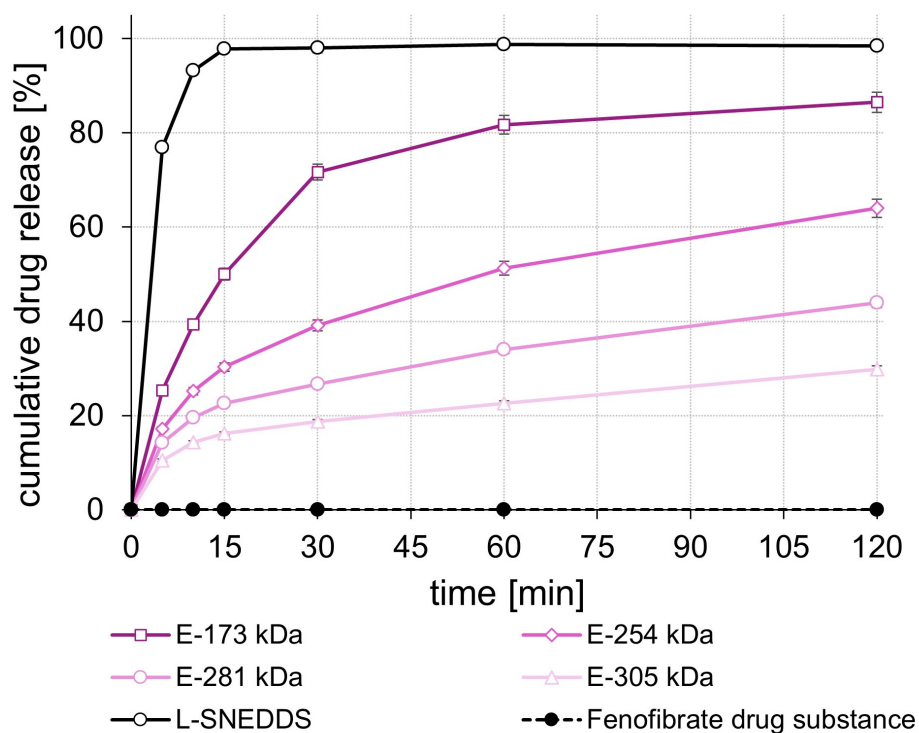

(a)

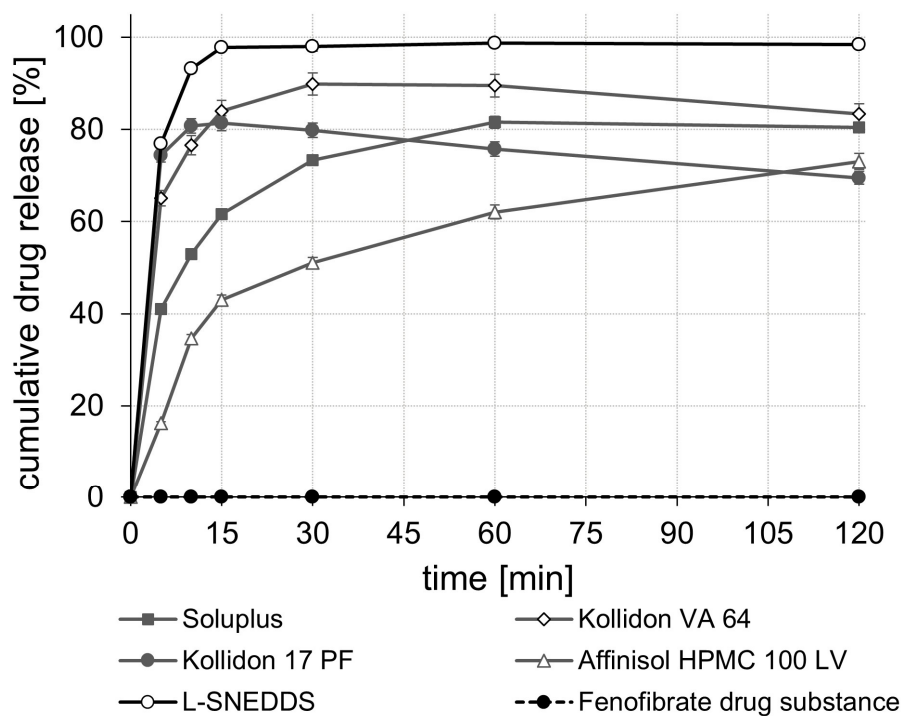

(b)

**Figure S9.** Dissolution profiles of fenofibrate drug substance and fenofibrate L- and S-SNEDDS based on ModeE (a), as well as fenofibrate drug substance and fenofibrate L- and S-SNEDDS based on other marketed (co)polymers (b) (after three months of storage at 30 °C/65% RH) in 500 mL 0.1 M HCl in USP apparatus II. Each value designates the mean  $\pm$  S.D. ( $n = 3$ ).
